# Supplementary material
Source: PubMed Central journal article supplement (PMC1255731)

**Supplementary Materials for**

**Chemical Synthesis and Thermodynamic Characterization of  
Oxanine-Containing Oligodeoxynucleotides**

Seung Pil Park<sup>1,2</sup>, Mitsuru Nonogawa<sup>3</sup>, Tsutomu Kodaki<sup>2,3</sup> and Keisuke Makino<sup>1,4\*</sup>

<sup>1</sup> International Innovation Center, Kyoto University, Yoshida-honmachi, Sakyo-ku, Kyoto 606-8501, Japan, <sup>2</sup> CREST, JST (Japanese Science and Technology), Kyoto University, Gokasho, Uji 611-0011, Japan, and <sup>3</sup> Institute of Advanced Energy, Kyoto University, Gokasho, Uji 611-0011, Japan.

## Figure Legend

**Figure S-1.** Preparative RP-HPLC separation of the HNO<sub>2</sub>-treated dGuo solution.

Reaction condition: dGuo; 100 mM, HNO<sub>2</sub> solution; a mixture of NaNO<sub>2</sub> (100 mM) and sodium acetate buffer (3.0 M, pH 3.7), temperature; 45°C, time; 4 hr. HPLC condition: mobile phase; sodium phosphate buffer (400 μM, pH 7.4) containing 10% CH<sub>3</sub>CN, flow rate; 6 ml/min, column; preparative COSMOSIL C<sub>18</sub>-PAQ (250 x 28 mm, 5 μm; Nacalai Tesques (Osaka, Japan)).

**Figure S-2.** RP-HPLC separation of DMT-dOxo and by-product generated from dOxo

in the 5'-*O* selective dimethoxytritylation for 3 hr. Reaction conditions: dOxo, 4-4'-dimethoxytritylchloride, DIEA-Mes and imidazole (the molar ratio being 1: 2: 2: 2). HPLC conditions: mobile phase; 90% aqueous methanol, flow rate; 0.7 ml/min, column; Ultron VX-Nucleotide (150 x 4.6 mm, 5 μm; Shinwa Co. (Kyoto, Japan)).

**Figure S-3.** <sup>1</sup>H NMR (a) and <sup>13</sup>C NMR (b) spectra (CD<sub>3</sub>CN at 30°C) of DMT-dOxo-amidite, which was prepared by phosphoramidation of DMT-dOxo using 2-cyanoethyl-*N,N,N',N'*-tetraisopropylphosphoramidite and tetrazole in anhydrous CH<sub>3</sub>CN, 3 hr.

**Figure S-4.** Mass spectroscopy analysis (FAB; *m/z* 1504 (M+H<sup>+</sup>)) of 5 mer Oxa-ODN

(5'-GCOAT-3'; C<sub>49</sub>H<sub>61</sub>N<sub>19</sub>O<sub>29</sub>P<sub>4</sub> (theoretical MW: 1503.283318)), synthesized by the method established here. (note : Matrix; glycerin, Inlet; direct, Ion mode; FAB+, Spectrum type; Normal ion [MF-linear], RT; 0.70min, Scan; (2,13), BP ; m/z 102.000, Int.; 1599.98, Output m/z range : 102.000 to 159.9097, Cut level; 0.00%).

**Figure S-5.** CD spectra data for investigating the base-pair effect of Oxa on whole structure of DNA duplex at 37°C (total concentration of the samples; 16 μM, buffer; 1 M NaCl, 10 mM Na<sub>2</sub>HPO<sub>4</sub>, 1 mM Na<sub>2</sub>EDTA (pH 7.0)). All the CD data were accumulated 10 times and processed through a noise reduction program.

**Figure S-6.** Linear van't Hoff equation plotting of  $T_m^{-1}$  vs  $\ln(C_t/4)$  for getting thermodynamic parameters,  $\Delta H^\circ$  and  $\Delta S^\circ$  of DNA duplexes containing O:N base pairs and G:C match.

Figure S-1.

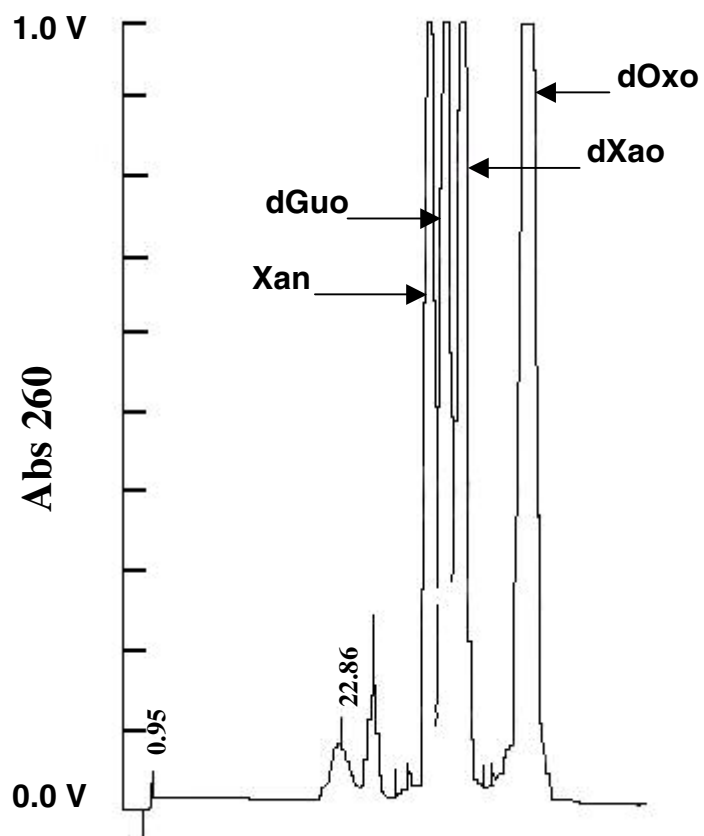

Figure S-2.

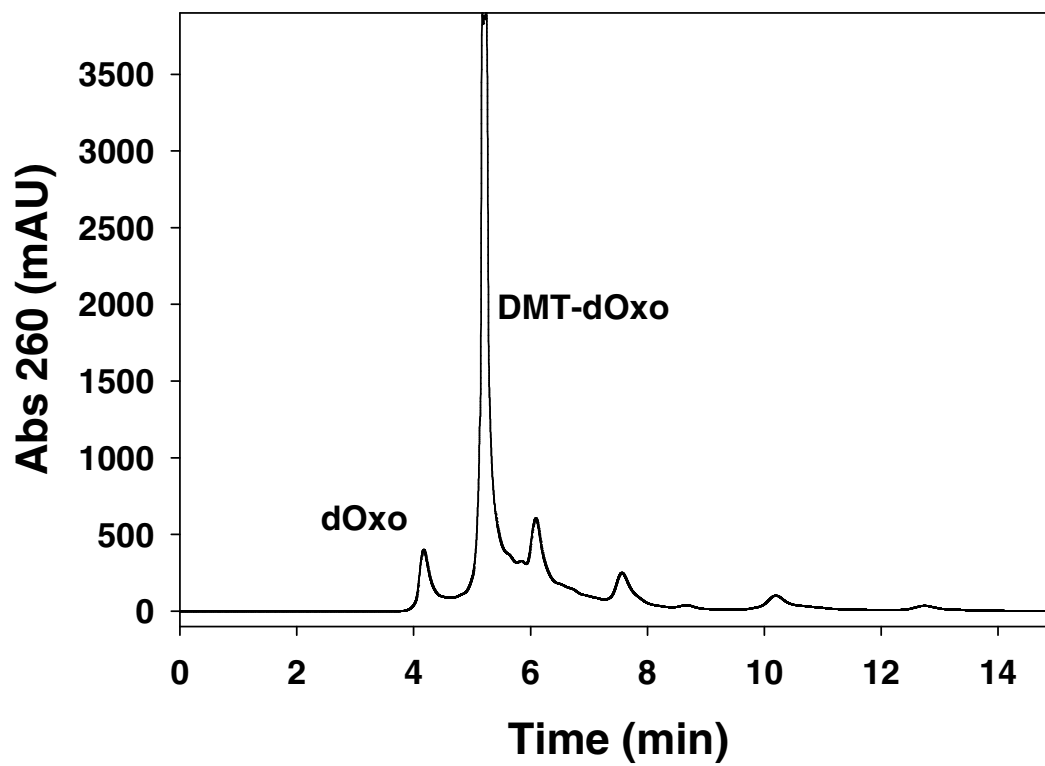

**Figure S-3.**

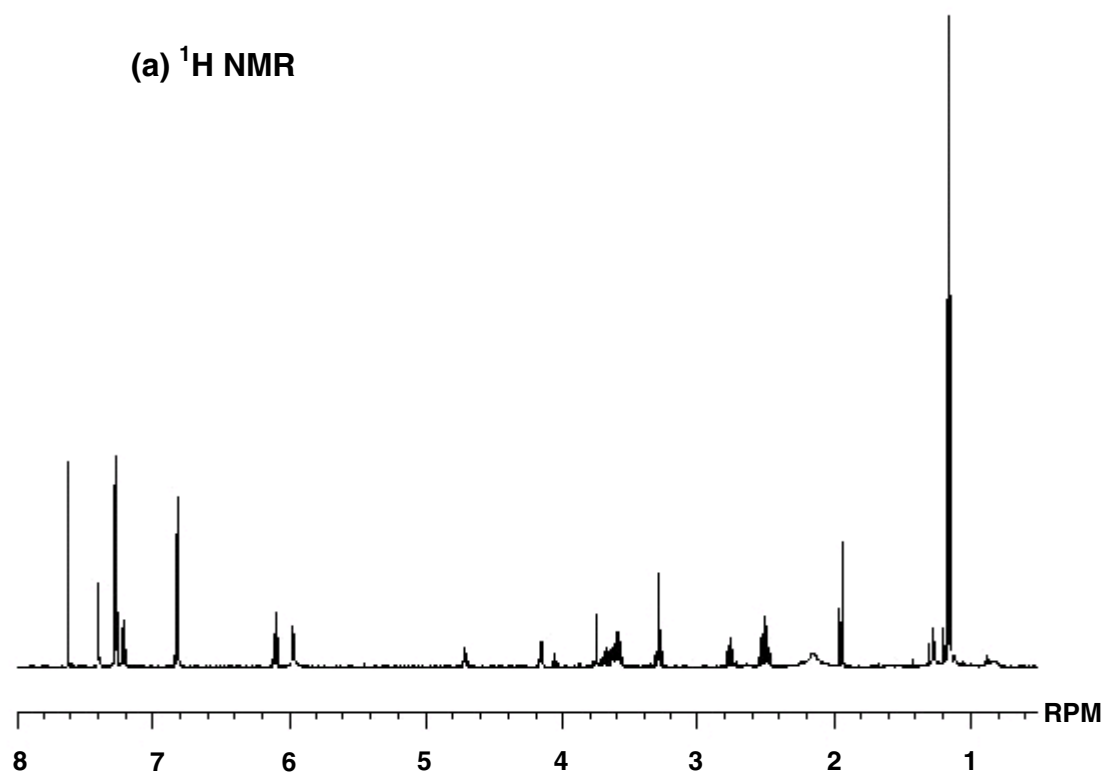

**Figure S-3.** (continued)

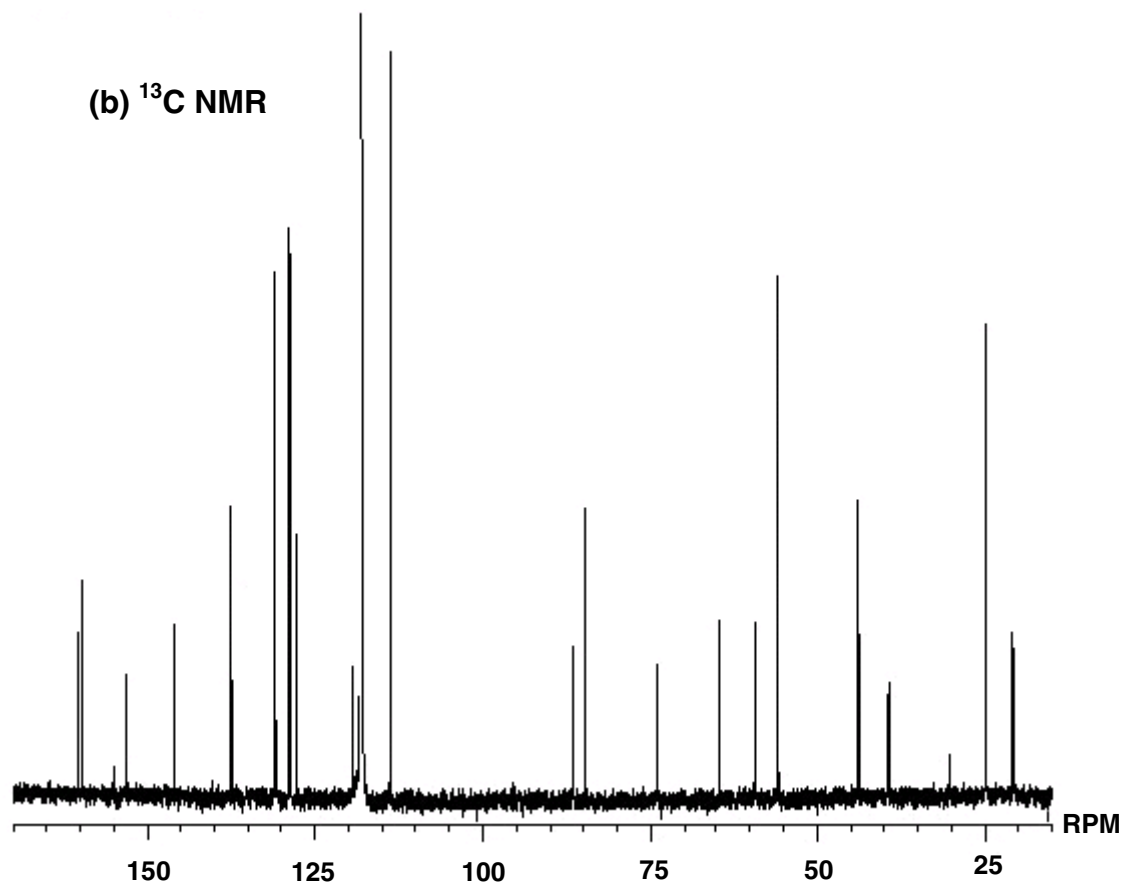

Figure S-4.

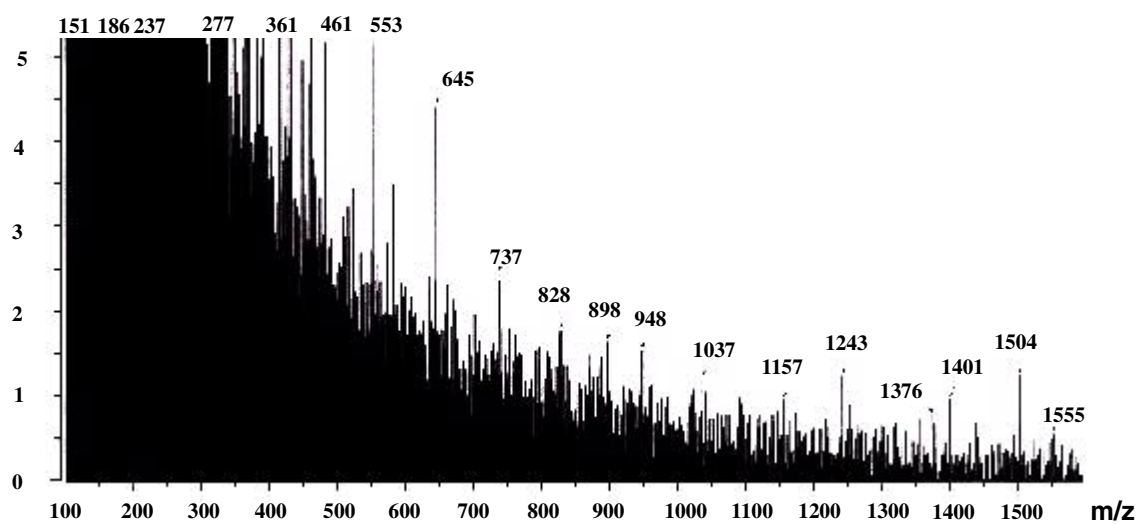



Figure S-5.

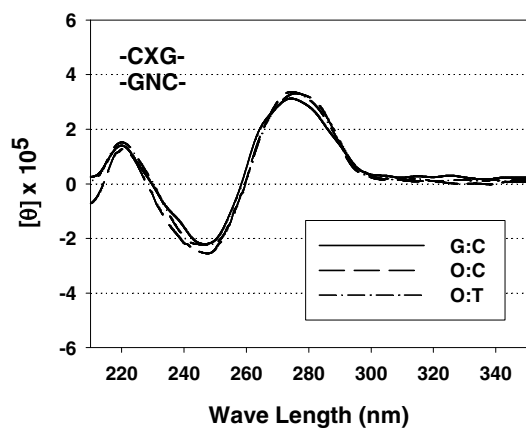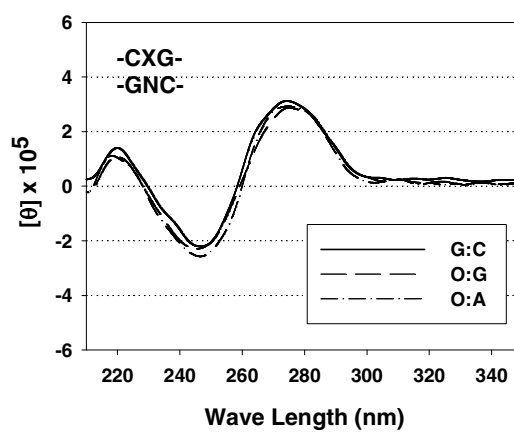

Figure S-6.

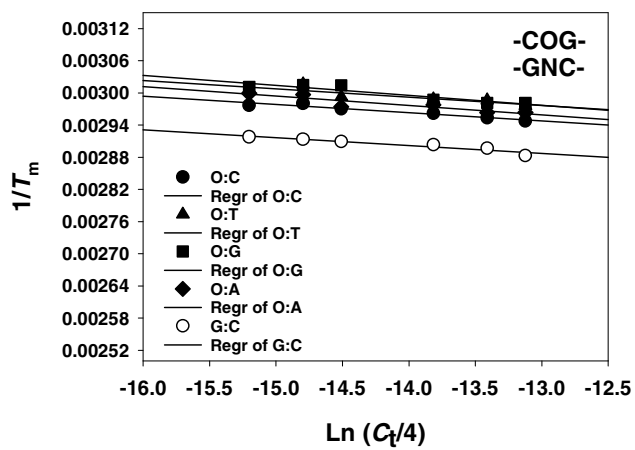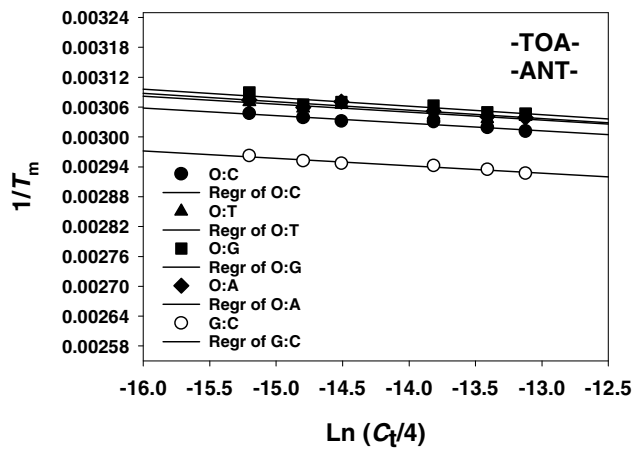

Supplement: nar_33_18_5771__1.pdf [file nar_33_18_5771__1.pdf]
